# Supplementary material
Source: publisher site journal article supplement (https://www.dovepress.com/article/295740)
Supplement: Supplementary file 1 [file get_supplementary_file.php]

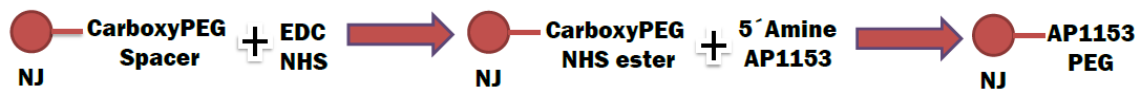

**Supplemental Figure 1** Bioconjugation strategy for the aptamer AP1153 attachment to the surface of a NanoJacket (NJ) via a PEG spacer.

**Abbreviations:** PEG=polyethylene glycol, EDC = 1-ethyl-3-(3-dimethylaminopropyl)-carbodiimide, NHS=N-Hydroxysuccinimide.
